# Supplementary material for: Long-range regulators of the lncRNA HOTAIR enhance its prognostic potential in breast cancer
Source: PubMed Central journal article supplement — Hum Mol Genet. 2016 Jul 4;25(15):3269–83. doi: 10.1093/hmg/ddw177 (PMC5179926; doi:10.1093/hmg/ddw177), 2016-07-04
Supplement: supp_ddw177_Milevskiy_HMG-2016-TWB-00214.R1_Supplemental_Data.pdf [file supp_ddw177_Milevskiy_HMG-2016-TWB-00214.R1_Supplemental_Data.pdf]

## Supplementary Figure Legends

**Figure S1. Chromatin-state map of the HOXC locus in breast cancer cells.** Histone modification and transcription factor binding across the *HOXC* locus, sourced from publically available ChIP-Seq data (Hg18), see Table S9.

**Figure S2. *HOTAIR* alternative promoter produces extra exons 5' to the *HOTAIR* transcript.** (A) RNA-Seq (GSE30567) analysis of the *HOTAIR* gene showing both positive and negative strands, indicating the start of the *HOTAIR* transcript. Graph Y-axis is indicative of the sequencing reads. Below, *HOTAIR* transcripts as annotated by RefSeq (73), Broad (74), sequence results for the PCR done in B and the *HOTAIR* promoters are shown as black lines. (B) S1 and S2 indicate endpoint PCR results of MCF7 cDNA complimenting RNA-Seq results (A).

**Figure S3. Analysis of transcription factor binding and the association of high conservation with each promoter fragment chosen for luciferase reporter assays.** From top to bottom are the regions cloned for *HOXC10* (C10), *HOTAIR* (P1) and *HOXC11* (C11) pGL3 promoter constructs. Predicted transcription factor tracks were sourced from ENCODE data available on the UCSC genome browser (77). Conservation shown is for the vertebrate group within the 46 species analysis on the human genome (Hg19). Histone methylation patterns indicative of active promoters are not shown but were strongly taken into consideration. Promoter primers listed in Table S7.

**Figure S4. Putative *HOTAIR* distal enhancer reporter activity demonstrates augmentation of *HOTAIR* promoter across cell lines.** (A and C) Schematic of vectors for luciferase assay. Promoters are from Figure S2. (B and D) Luciferase reporter activity for pGL3 constructs in MCF7, T47D and MDA-MB-453. Y-axis is relative light units (RLU) based on normalization to Renilla (pRL-TK) transfection control and pGL3-Basic (vehicle). All statistical tests performed were two-tailed *t*-Tests with P-values equal to <0.05 (\*), <0.01 (\*\*), <0.001 (\*\*\*) and <0.0001 (\*\*\*\*).

**Figure S5. Demonstration of RNA production from alternative *HOTAIR* promoter in MCF7 cells.** RNA-Seq (GSE30567) analysis of the *HOTAIR* gene showing both positive and negative strands, indicating the start of the *HOTAIR* transcript. Graph Y-axis is indicative of the sequencing reads. Below, *HOTAIR* transcripts as annotated by RefSeq (73) and Broad (74).

**Figure S6. FOXA1 knockdown affects expression of HOXC genes in MDA-MB-453 cells.** A and B, Analysis of HOXC gene expression in MDA-MB-453 breast cancer cells following knockdown of FOXA1 (n=6). Data is normalized to RPLP0 and the scrambled control in A and in B, expression normalized to RNU6B and RPLP0. Statistical significance was tested via two-tailed *t*-Tests with P values equal to <0.05 (\*), <0.01 (\*\*), <0.001 (\*\*\*) and <0.0001 (\*\*\*\*).

**Figure S7. *HOTAIR* hierarchical clusters display differential hormone receptor status and PAM50 classification.** (A) Distribution of tumor hormone receptor (HR) IHC status for clusters 1 and 2. (B) Distribution of PAM50 molecular subtype classifications between clusters 1 and 2. Data sourced from TCGA (79).

**Figure S8. The combination of *HOTAIR* and *FOXMI* expression stratifies luminal subtypes.** The average expression of *HOTAIR* combined with *FOXMI*, across the PAM50 intrinsic subtypes of breast cancer. Data is relative expression, based on RSEM expression quantification from the TCGA dataset (79). Tumor numbers for each subgroup are as follows, Basal-like (140, Basal), HER2-enriched (67, HER2), Luminal A (420, LumA) Luminal B (194, LumB) and Normal-like (24, N-Like).

**Figure S9. MCF7 positive control gene expression response to estrogen treatment. (A)** Expression for *ERS1*, *PGR*, *MYC* and *FOS* as positive control genes for the appropriate response to estrogen stimulation, done for RNA-Seq. **(B)** Expression for *TFF1* to confirm appropriate response to MCF7 cells responding to estrogen stimulation for the qRT-PCR experiments.

### Supplementary Tables

**Table S1.** Pearson correlation coefficients for Figure 5A Manhattan hierarchical clustering and their corresponding p-values.

**Table S2.** *HOTAIR* or *FOXMI* alone or in combination significantly stratify the survival of patients with ER+ breast tumors. ER positivity was determined by gene expression in Kaplan-Meier Plotter (78).

**Table S3.** *HOTAIR* or *FOXMI* alone or in combination significantly stratify the survival of patients with ER+/N+ breast tumors. ER positivity was determined by gene expression in Kaplan-Meier Plotter (78).

**Table S4.** *HOTAIR* or *FOXMI* alone or in combination significantly predicts response to therapy for patients with ER+ or ER+/N+ breast tumors, through stratification of relapse free survival. Treatment indicated in second column, patients received only tamoxifen (Tam) or only endocrine therapy (ET) or the combination of ET and chemotherapy (CT). ER positivity was determined by gene expression in Kaplan-Meier Plotter (78).

**Table S5.** *HOTAIR* and its associated transcription factors significantly stratify the relapse free survival of breast cancer patients with tumors based on intrinsic molecular subtypes. Kaplan-Meier survival analysis performed through the online database Kaplan-Meier Plotter (78).

**Table S6.** Primer sequences for 3C-qPCR analysis of relative interaction frequencies in *HindIII* 3C assays.

**Table S7.** Primer sequences for *HOXC* promoter constructs for cloning into pGL3 and subsequent luciferase reporter assays.

**Table S8.** TaqMan® Assay IDs for probes used in qRT-PCR assays.

**Table S9.** GEO and EBI accession codes for ChIP-Seq, RNA-Seq and ChIA-PET data.

**Figure S1.** Chromatin-state map of the *HOXC* Locus in breast cancer cells.

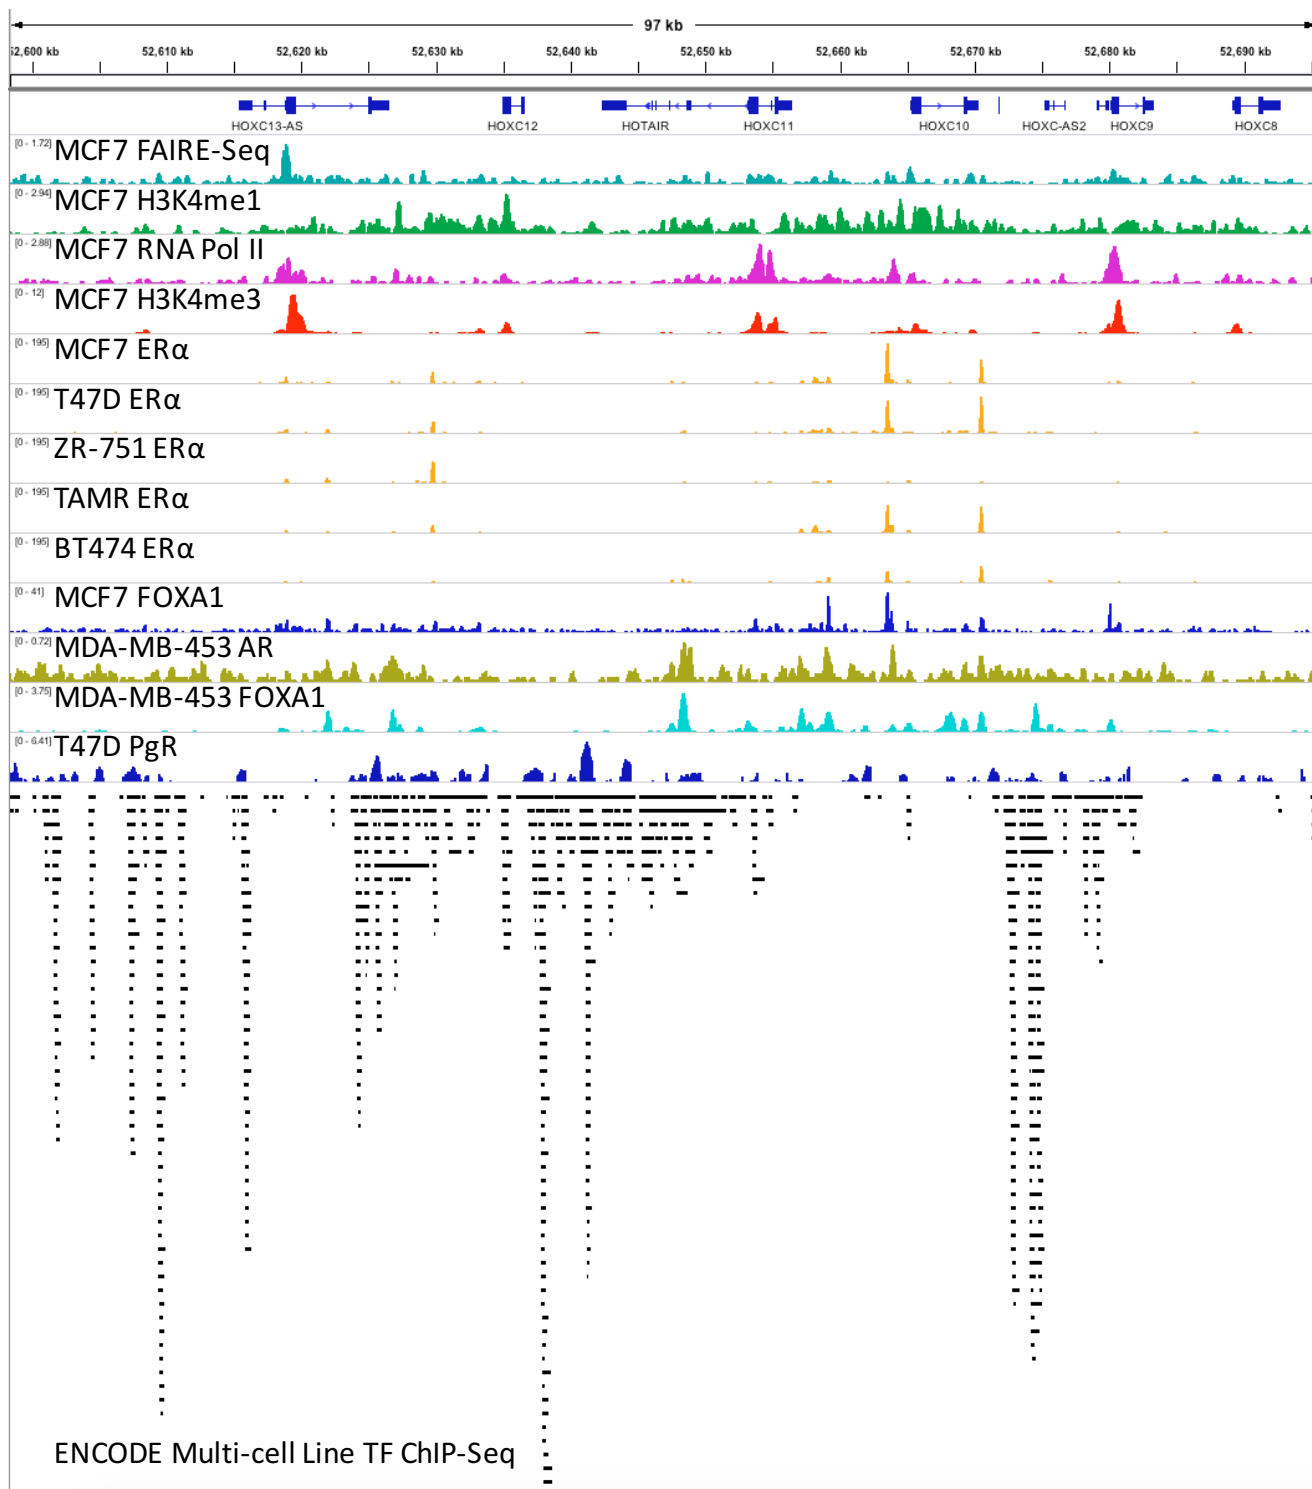

# Figure S2. *HOTAIR* alternative promoter produces extra exons 5' to the *HOTAIR* transcript

A

Chromosome 12 hg19

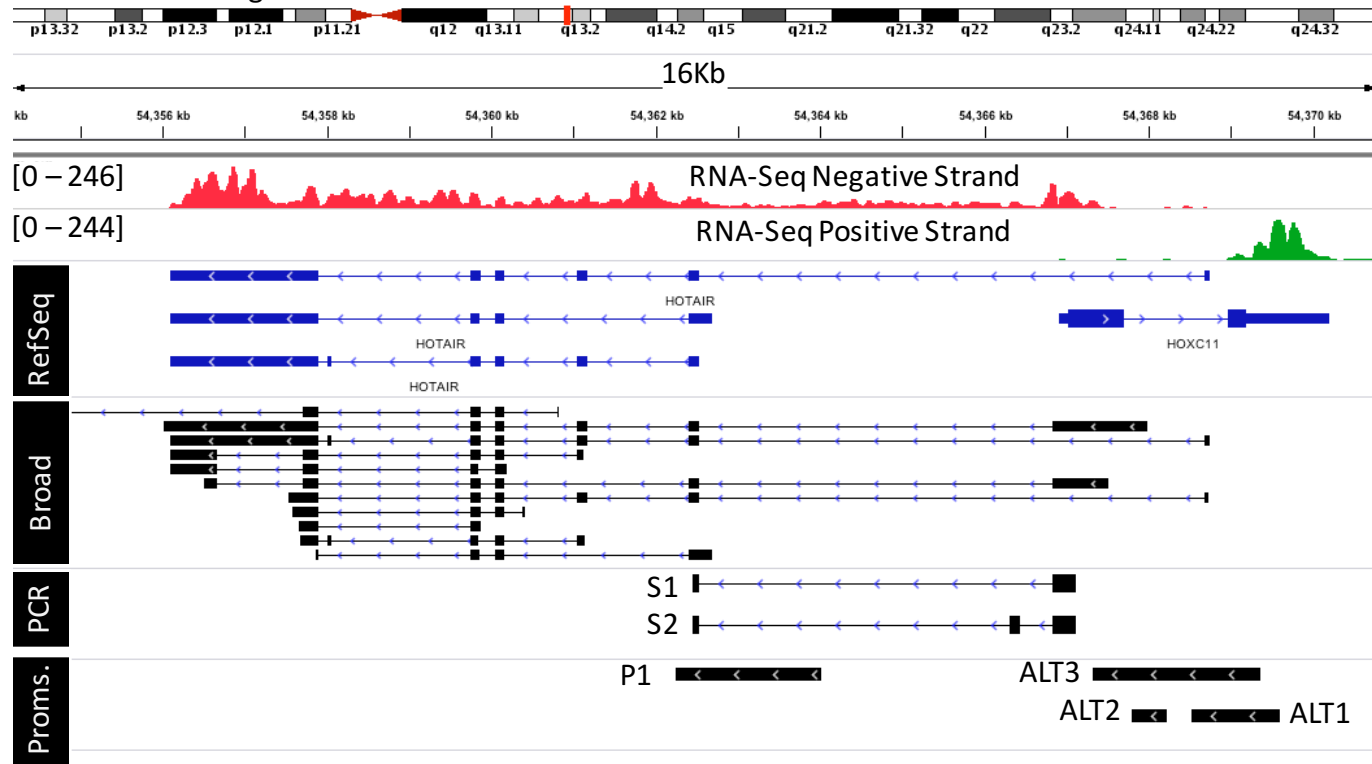

B

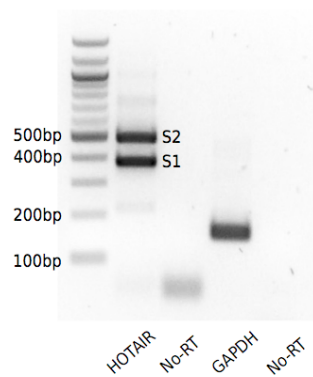

**Figure S3.** Analysis of transcription factor binding and the association of high conservation with each promoter fragment chosen for luciferase reporter assays

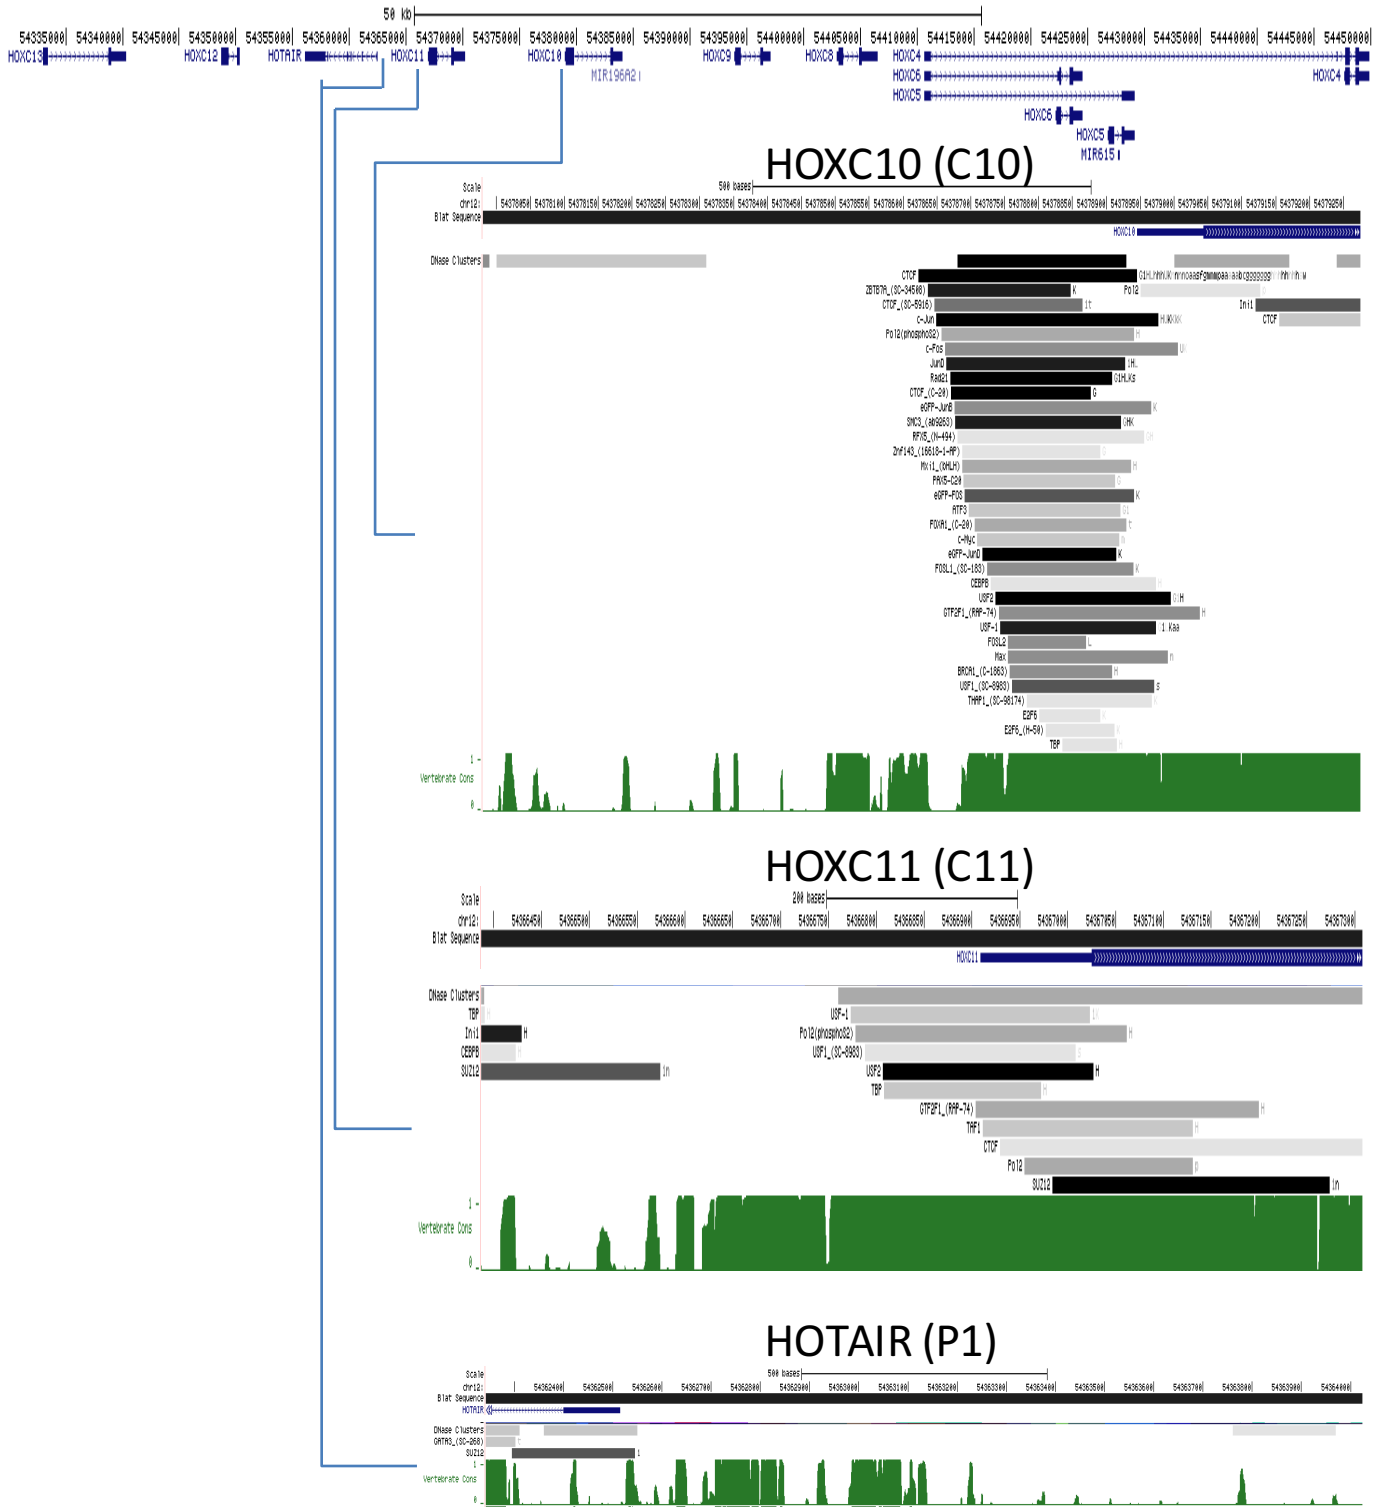

**Figure S4.** Putative *HOTAIR* distal enhancer reporter activity demonstrates augmentation of *HOTAIR* promoter across cell lines

A

Promoter and Enhancer Reporter Constructs

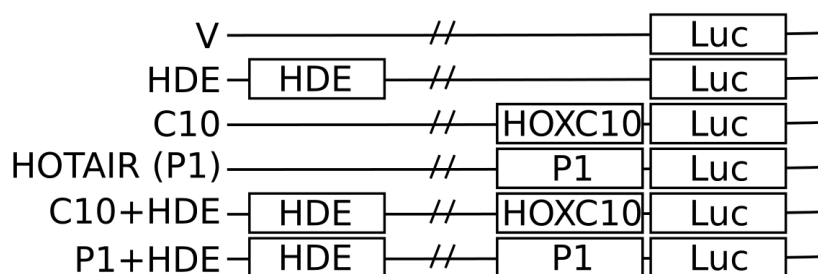

B

HDE Activity

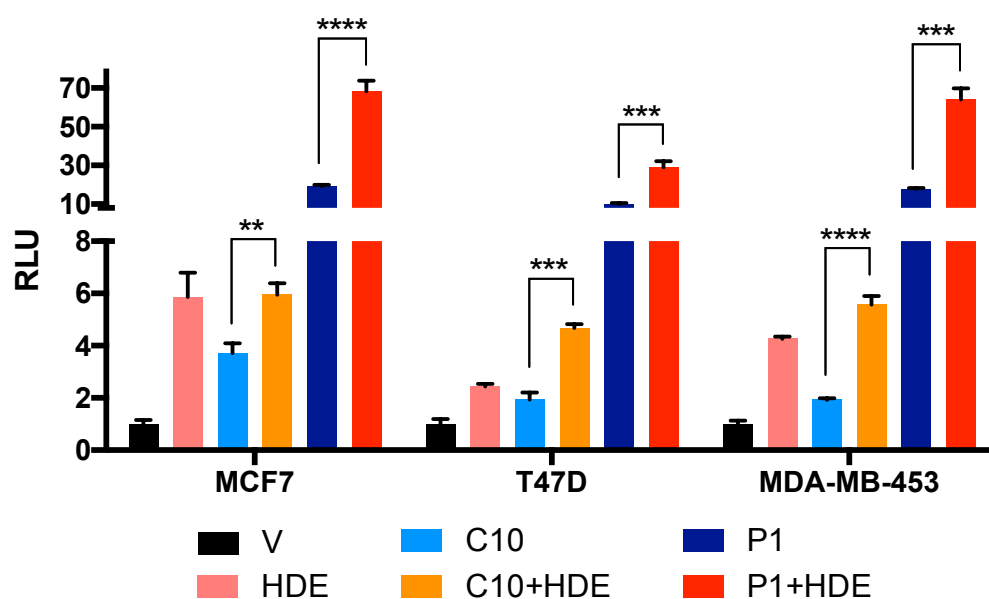

C

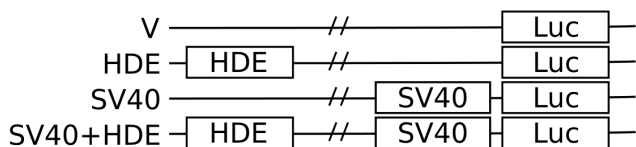

D

HDE Activity

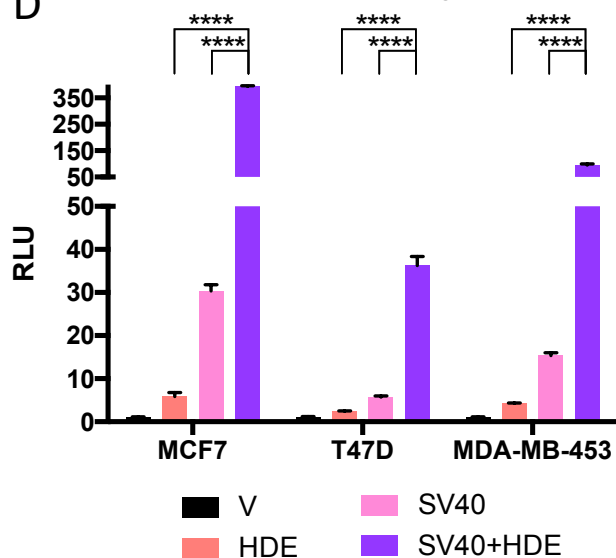

**Figure S5.** Demonstration of RNA production from alternative HOTAIR promoter in MCF7 cells.

Chromosome 12 hg19

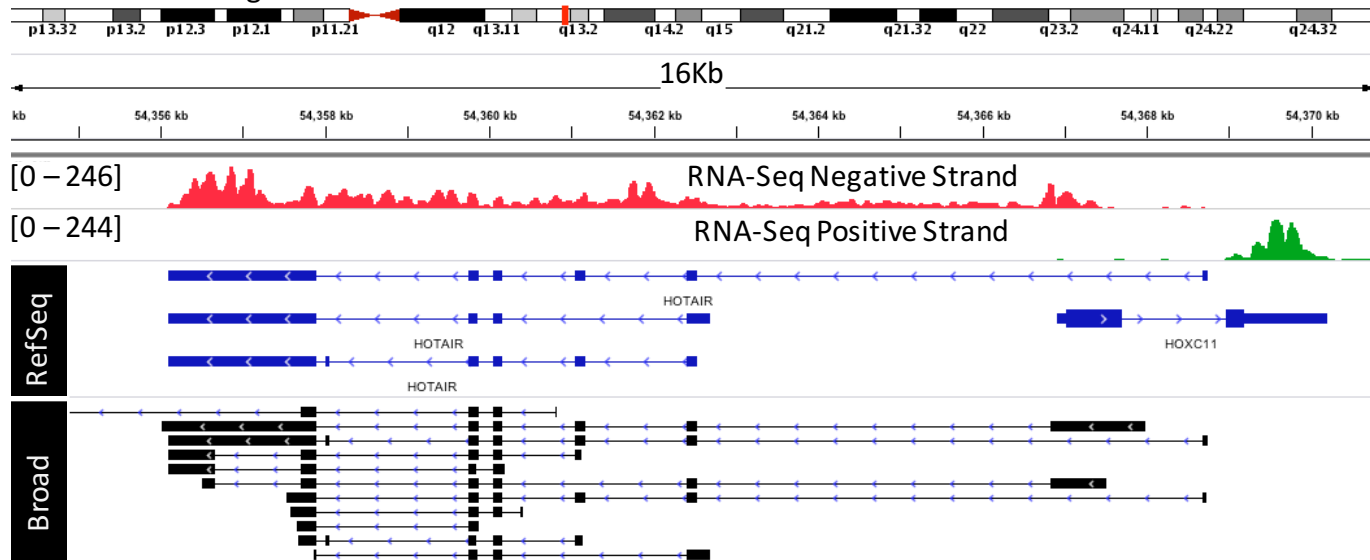

**Figure S6.** FOXA1 knockdown affects expression *HOXC* genes in MDA-MB-453 cells.

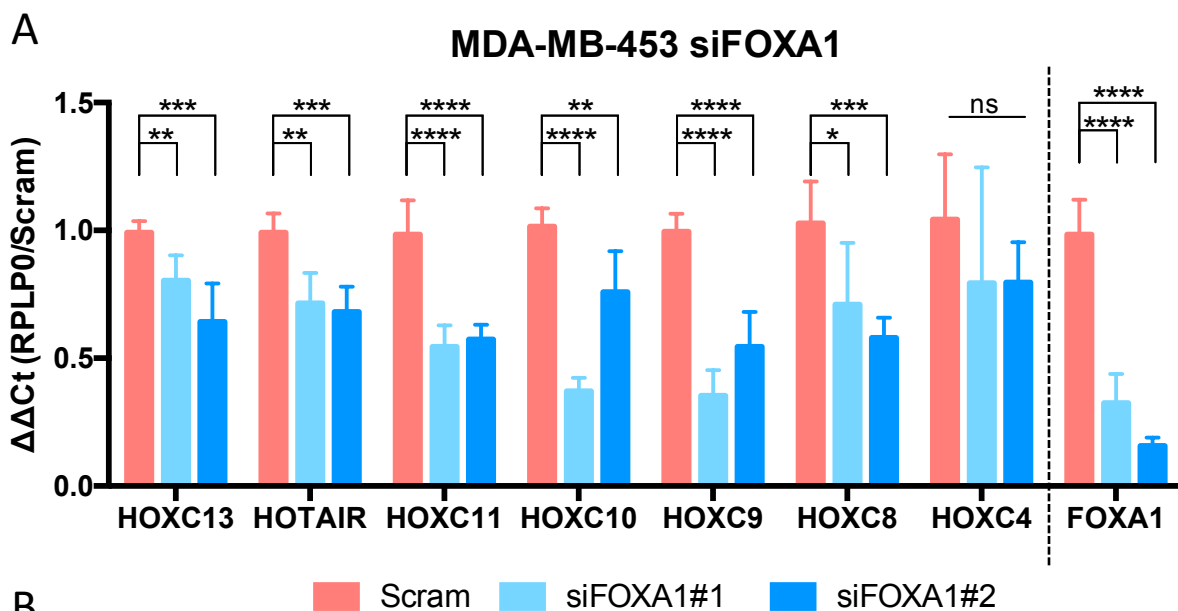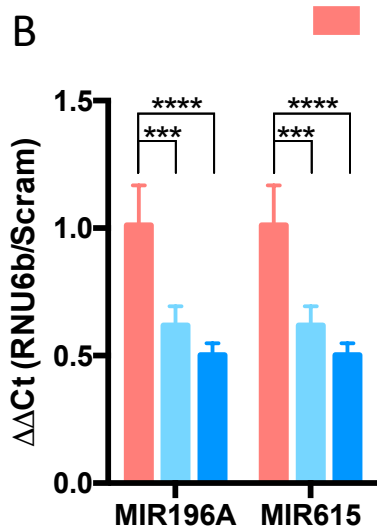



**Figure S7.** *HOTAIR* hierarchical clusters display differential hormone receptor status and PAM50 classification

A)

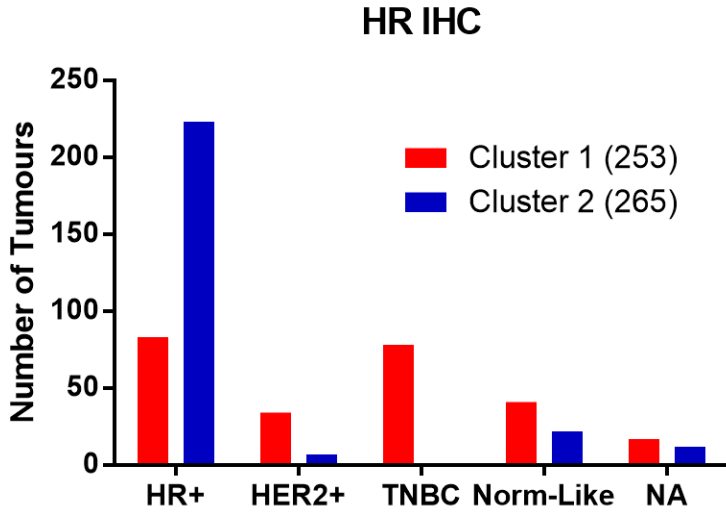

|              | Cluster 1  | Cluster 2  |
|--------------|------------|------------|
| HR+          | 83         | 223        |
| HER2+        | 34         | 7          |
| TNBC         | 78         | 1          |
| Norm-Like    | 41         | 22         |
| NA           | 17         | 12         |
| <b>Total</b> | <b>253</b> | <b>265</b> |

$\chi^2$  Test P = < 0.0001

B)

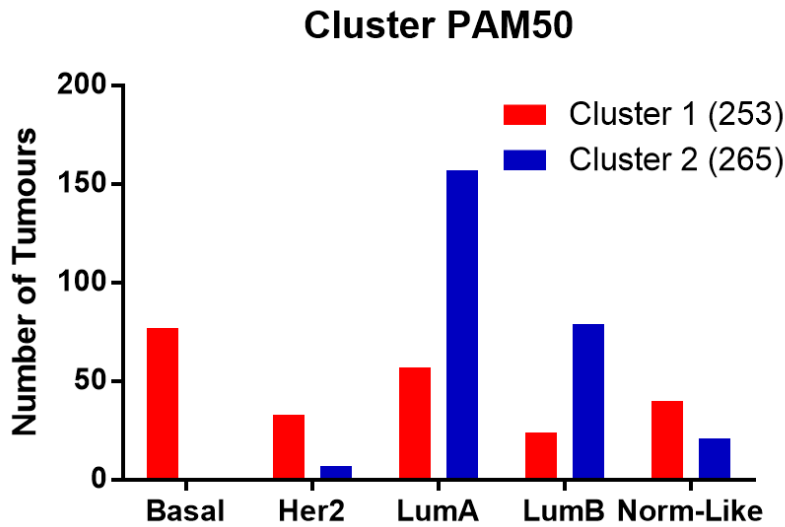

|              | Cluster 1  | Cluster 2  |
|--------------|------------|------------|
| Basal        | 77         | 1          |
| Her2         | 33         | 7          |
| LumA         | 57         | 157        |
| LumB         | 24         | 79         |
| Norm-Like    | 40         | 21         |
| NA           | 22         | 0          |
| <b>Total</b> | <b>253</b> | <b>265</b> |

$\chi^2$  Test P = < 0.0001

**Figure S8.** The combination of *HOTAIR* and *FOXM1* expression stratifies luminal subtypes

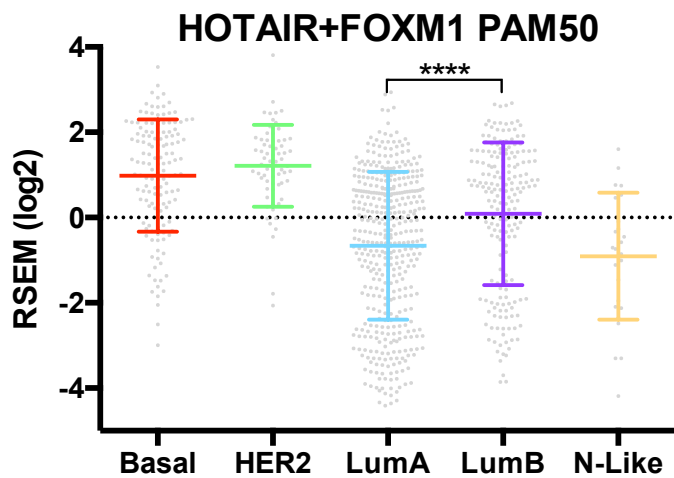

**Figure S9.** MCF7 positive control gene expression response to estrogen treatment

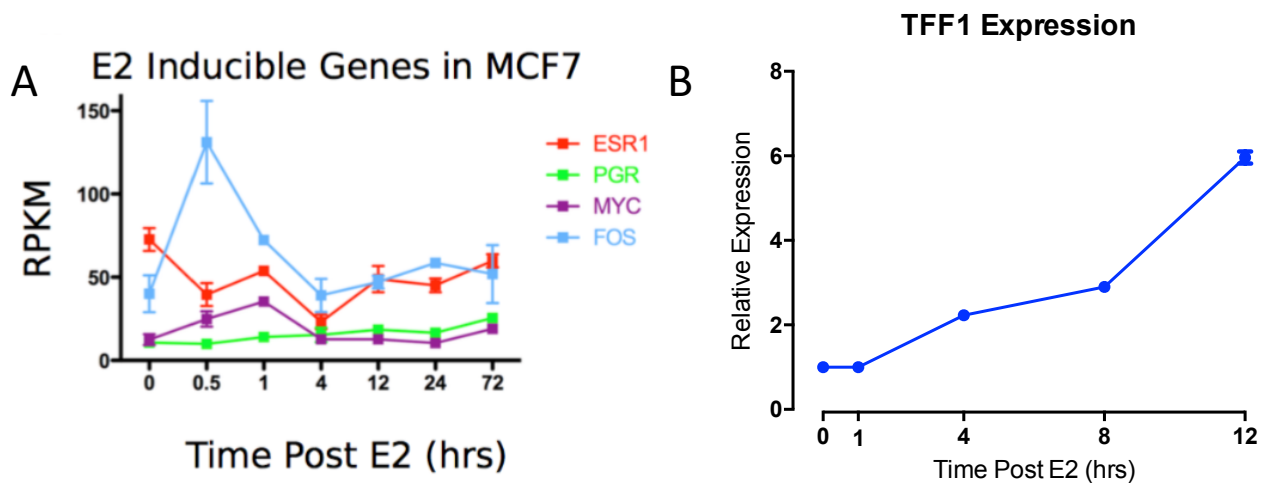

**Table S1.** Pearson correlation coefficients for Figure 5A  
Manhattan hierarchical clustering and their corresponding p-values.

| NAME     | Cluster 1 | Cluster 2 | Correl All |
|----------|-----------|-----------|------------|
| HOXC12   | 0.661     | 0.269     | 0.524      |
|          | 1.40E-34  | 4.41E-06  | 6.10E-40   |
| HOXC11   | 0.777     | 0.463     | 0.732      |
|          | 1.23E-54  | 1.89E-16  | 5.01E-93   |
| HOXC10   | 0.793     | 0.386     | 0.766      |
|          | 2.86E-58  | 1.62E-11  | 8.22E-107  |
| HOXC13   | 0.678     | 0.525     | 0.725      |
|          | 6.00E-37  | 2.04E-21  | 3.60E-90   |
| HOTAIR   | 1         | 1         | 1          |
|          | 0         | 0         | 0          |
| FOS      | -0.210    | 0.122     | -0.030     |
|          | 5.76E-04  | 4.01E-02  | 4.78E-01   |
| FOX M1   | 0.427     | -0.028    | 0.141      |
|          | 3.93E-13  | 6.34E-01  | 9.08E-04   |
| HOXC9    | 0.431     | 0.147     | 0.499      |
|          | 2.15E-13  | 1.31E-02  | 8.88E-36   |
| HOXC8    | 0.364     | 0.279     | 0.464      |
|          | 1.13E-09  | 1.82E-06  | 1.39E-30   |
| HOXC4    | 0.045     | 0.093     | 0.144      |
|          | 4.71E-01  | 1.19E-01  | 7.49E-04   |
| HOXC5    | 0.135     | 0.097     | 0.299      |
|          | 2.87E-02  | 1.05E-01  | 9.38E-13   |
| HOXC6    | 0.153     | 0.072     | 0.284      |
|          | 1.31E-02  | 2.30E-01  | 1.30E-11   |
| TLE3     | -0.524    | -0.091    | -0.168     |
|          | 4.99E-20  | 1.28E-01  | 8.05E-05   |
| NCOA3    | 0.217     | -0.093    | 0.154      |
|          | 3.93E-04  | 1.18E-01  | 2.97E-04   |
| JUN      | 0.087     | 0.084     | 0.082      |
|          | 1.57E-01  | 1.57E-01  | 5.56E-02   |
| GREB1    | -0.603    | 0.049     | -0.059     |
|          | 1.59E-27  | 4.08E-01  | 1.66E-01   |
| FOXA1    | -0.386    | 0.109     | 0.000      |
|          | 8.47E-11  | 6.68E-02  | 9.93E-01   |
| GATA3    | -0.544    | 0.022     | -0.092     |
|          | 9.67E-22  | 7.12E-01  | 3.11E-02   |
| ESR1     | -0.692    | 0.007     | -0.177     |
|          | 6.14E-39  | 9.09E-01  | 3.24E-05   |
| Tumour # | 264       | 279       | 543        |
| Tumour % | 48.62%    | 51.38%    |            |

**Table S2.** *HOTAIR* or *FOXM1* alone or in combination significantly stratify the survival of patients with ER+ breast tumors. ER positivity was determined by gene expression in Kaplan-Meier Plotter.

|                       | Gene           | Survival | Logrank |               |          | Tumour # |      |
|-----------------------|----------------|----------|---------|---------------|----------|----------|------|
|                       |                |          | HR      | 95% CI        | P-Value  | Low      | High |
| ER+ (Gene Expression) | HOTAIR         | RFS      | 1.43    | (1.15 - 1.77) | 1.20E-03 | 368      | 637  |
|                       |                | DMFS     | 2.51    | (1.49 - 4.22) | 3.20E-04 | 123      | 221  |
|                       |                | OS       | 1.63    | (1.01 - 2.64) | 4.40E-02 | 163      | 71   |
|                       |                | PPS      | 1.68    | (1.00 - 2.82) | 4.80E-02 | 58       | 28   |
|                       | FOXM1          | RFS      | 2.31    | (1.90 - 2.80) | 1.00E-16 | 544      | 1636 |
|                       |                | DMFS     | 2.58    | (2.02 - 3.29) | 1.80E-15 | 647      | 292  |
|                       |                | OS       | 3.71    | (2.55 - 5.39) | 2.30E-13 | 202      | 305  |
|                       |                | PPS      | 1.83    | (1.25 - 2.68) | 1.70E-03 | 67       | 178  |
|                       | FOXM1 + HOTAIR | RFS      | 2.31    | (1.74 - 3.08) | 3.00E-09 | 251      | 754  |
|                       |                | DMFS     | 2.06    | (1.35 - 3.14) | 6.70E-04 | 242      | 102  |
|                       |                | OS       | 2.03    | (1.26 - 3.27) | 3.00E-03 | 166      | 68   |
|                       |                | PPS      | 1.73    | (1.02 - 2.94) | 4.10E-02 | 34       | 52   |

**Table S3.** *HOTAIR* or *FOXM1* alone or in combination significantly stratify the survival of patients with ER+/N+ breast tumors. ER positivity was determined by gene expression in Kaplan-Meier Plotter.

|                                | Gene              | Survival | Logrank |               |          | Tumour # |      |
|--------------------------------|-------------------|----------|---------|---------------|----------|----------|------|
|                                |                   |          | HR      | 95% CI        | P-Value  | Low      | High |
| ER+/N+<br>(Gene<br>Expression) | HOTAIR            | RFS      | 1.58    | (1.09 - 2.28) | 1.40E-02 | 166      | 283  |
|                                |                   | DMFS     | 1.87    | (0.70 - 4.97) | 2.00E-01 | 35       | 52   |
|                                | FOXM1             | RFS      | 2.65    | (1.91 - 3.65) | 5.80E-10 | 224      | 405  |
|                                |                   | DMFS     | 2.49    | (1.41 - 4.41) | 1.20E-03 | 90       | 126  |
|                                | FOXM1 +<br>HOTAIR | RFS      | 3.23    | (1.89 - 5.53) | 6.20E-06 | 112      | 337  |
|                                |                   | DMFS     | 6.64    | (0.89 - 49.8) | 3.30E-02 | 22       | 65   |

**Table S4.** *HOTAIR* or *FOXM1* alone or in combination significantly predicts response to therapy for patients with ER+ or ER+/N+ breast tumors, through stratification of relapse free survival. Treatment indicated in second column, patients received only tamoxifen (Tam) or only endocrine therapy (ET) or the combination of ET and chemotherapy (CT). ER positivity was determined by gene expression in Kaplan-Meier Plotter.

|                          | Gene           | Treat. | Logrank |               |          | Tumour # |      |
|--------------------------|----------------|--------|---------|---------------|----------|----------|------|
|                          |                |        | HR      | 95% CI        | P-Value  | Low      | High |
| ER+ (Gene Expression)    | HOTAIR         | Tam    | 1.74    | (0.66 - 4.58) | 2.50E-01 | 65       | 26   |
|                          |                | ET     | 1.58    | (0.84 - 2.98) | 1.50E-01 | 87       | 71   |
|                          |                | ET/CT  | 2.11    | (1.02 - 4.38) | 4.10E-02 | 96       | 40   |
|                          | FOXM1          | Tam    | 2.88    | (2.12 - 3.91) | 1.50E-12 | 359      | 182  |
|                          |                | ET     | 2.74    | (2.08 - 3.60) | 7.30E-14 | 438      | 232  |
|                          |                | ET/CT  | 4.22    | (1.96 - 9.11) | 6.70E-05 | 86       | 50   |
|                          | FOXM1 + HOTAIR | Tam    | 8.43    | (1.93 - 36.9) | 6.90E-04 | 47       | 44   |
|                          |                | ET     | 3.69    | (1.70 - 8.05) | 4.20E-04 | 75       | 83   |
|                          |                | ET/CT  | 3.41    | (1.54 - 7.05) | 4.80E-04 | 101      | 35   |
| ER+/N+ (Gene Expression) | HOTAIR         | Tam    | 0.59    | (0.19 - 1.82) | 3.50E-01 | 11       | 32   |
|                          |                | ET     | 0.58    | (0.22 - 1.53) | 2.60E-01 | 16       | 37   |
|                          |                | ET/CT  | 1.78    | (0.79 - 4.01) | 1.60E-01 | 84       | 29   |
|                          | FOXM1          | Tam    | 2.96    | (1.52 - 5.76) | 8.50E-04 | 43       | 118  |
|                          |                | ET     | 2.74    | (1.48 - 5.07) | 8.10E-04 | 51       | 121  |
|                          |                | ET/CT  | 5.84    | (2.31 - 14.7) | 2.30E-05 | 69       | 44   |
|                          | FOXM1 + HOTAIR | Tam    | 4.24    | (0.94 - 19.2) | 4.10E-02 | 18       | 25   |
|                          |                | ET     | 3.51    | (1.03 - 12.0) | 4.40E-02 | 12       | 41   |
|                          |                | ET/CT  | 3.38    | (1.54 - 7.42) | 1.30E-03 | 84       | 29   |

**Table S5.** *HOTAIR* and its associated transcription factors significantly stratify the overall survival of breast cancer patients with tumors based on intrinsic molecular subtypes. Kaplan-Meier survival analysis performed through the online database Kaplan-Meier Plotter.

|              | Subtype  | Logrank |               |          | Tumour # |      |
|--------------|----------|---------|---------------|----------|----------|------|
|              |          | HR      | 95% CI        | P-Value  | Low      | High |
| HOTAIR       | Basal    | 1.96    | (0.68 - 5.69) | 2.00E-01 | 33       | 87   |
|              | LumA     | 1.38    | (0.70 - 2.73) | 3.50E-01 | 46       | 103  |
|              | LumB     | 2.54    | (1.17 - 5.51) | 1.40E-02 | 54       | 31   |
|              | HER2     | 4.36    | (1.66 - 11.5) | 1.10E-03 | 36       | 20   |
|              | ER+ (GE) | 1.63    | (1.01 - 2.64) | 4.40E-02 | 163      | 71   |
| TFs          | Basal    | 0.62    | (0.34 - 1.12) | 1.10E-01 | 43       | 126  |
|              | LumA     | 0.66    | (0.43 - 1.01) | 5.30E-02 | 81       | 194  |
|              | LumB     | 1.22    | (0.73 - 2.06) | 4.50E-01 | 57       | 175  |
|              | HER2     | 1.95    | (0.91 - 4.20) | 8.30E-02 | 41       | 26   |
|              | ER+ (GE) | 0.83    | (0.58 - 1.18) | 3.00E-01 | 378      | 129  |
| HOTAIR + TFs | Basal    | 0.48    | (0.21 - 1.09) | 7.30E-02 | 31       | 89   |
|              | LumA     | 2.49    | (1.05 - 5.89) | 3.20E-02 | 37       | 112  |
|              | LumB     | 1.73    | (0.65 - 4.60) | 2.60E-01 | 23       | 62   |
|              | HER2     | 6.03    | (1.39 - 26.2) | 6.40E-03 | 24       | 32   |
|              | ER+ (GE) | 1.47    | (0.92 - 2.36) | 1.10E-01 | 146      | 88   |



**Table S6.** Primer sequences for 3C-qPCR analysis of relative interaction frequencies in *HindIII* 3C assays.

| Oligo Name            | Sequence (5' to 3')              | Application         |
|-----------------------|----------------------------------|---------------------|
| HOXC_ENH1_DW3F        | GGATGAGATGGGAGGAGTGGGGTAGG       | HindIII Fragment 1  |
| HOXC_ENH1_dw2R        | AGGCAATCGATCAGAGTCGCCTGG         | HindIII Fragment 2  |
| HOXC_ENH1_dw1R        | GACCAATCCACTACAGGCCAAATGTACACC   | HindIII Fragment 3  |
| HOXC_ENH1_IntR        | GGTCAGTCTGAGAAACCTTCGTGGAAGAGG   | HindIII Fragment 4  |
| HOXC_ENH1_up1R        | CCAGATGCTACCAGCACACACCGTTAGG     | HindIII Fragment 5  |
| HOXC_ENH1_up2F        | CCTGCCCTCACCACACACAAGTGTG        | HindIII Fragment 6  |
| HOXC_ENH1_up3R        | CCTGGATGCCTCAGCAAGGATTGTCAG      | HindIII Fragment 7  |
| HOXC_ENH1_up4R        | GGAAGTTTGGCCTCATGGCTCCTGC        | HindIII Fragment 8  |
| HOXC_ENH1_up5R        | CCTCAGGGCCTTTGACTTGCTGTCCAC      | HindIII Fragment 9  |
| HOXC_ENH1_up6F        | GGTCTACCTGCTCAGAGAGTACACAGCTGAGG | HindIII Fragment 10 |
| HOXC_ENH1_up7R        | GGTTTAAGCGAAGAGCTGGCAGGATGC      | HindIII Fragment 11 |
| HOXC_ENH1_up8R        | CCATCCCCTTCAATCCTCCCTTAACTCC     | HindIII Fragment 12 |
| HOXC_ENH1_up9F        | AAGGAAGCACAAATGGGCACCTGTCC       | HindIII Fragment 13 |
| HOXC_ENH1_up10F       | GCTGTCTTTCCCTGGAATTCCTCCTCC      | HindIII Fragment 14 |
| HOXC_ENH1_up11F       | CTCACCCCTGTCTCCAATCCTCTTAACTCC   | HindIII Fragment 15 |
| HOXC_ENH1_up12R       | CCTTAGGCCACCCATGTCAATGTCTAGC     | HindIII Fragment 16 |
| HOXC_ENH1_up13R       | CCAAGCCGCTGCTTATTCCAACC          | HindIII Fragment 17 |
| HOXC_ENH1_up14R       | ATGTGCCTTCCCACCTCCATTATTGAGG     | HindIII Fragment 18 |
| HOXC_ENH1_up15R       | GCTTGTGAGGCCACAGGAATACACC        | HindIII Fragment 19 |
| HOXC_ENH2_Int2R       | CCGTCTTACCACACCCTCC              | HindIII Fragment 20 |
| HOXC_ENH3_Int3R       | CTCAGGGAATGTGAGTCAATCCAACCTCG    | HindIII Fragment 21 |
| HOXC_ENH3_up1R        | GGATGACACTATCTCACAGCCAAAGACACC   | HindIII Fragment 22 |
| HOXC_ENH3_up2R        | GACTGGCTGACACCATGATGCTTTTGC      | HindIII Fragment 23 |
| HOXC_ENH3_up3R        | CTCCCAAACATCGAACCCCTAAAATGG      | HindIII Fragment 24 |
| HOXC_ENH3_up4R        | CAGGCTGATCTCCCCTGTAATCCATGC      | HindIII Fragment 25 |
| HOXC_ENH4_Int4F       | TCCCTCTTTGACACTCAGTTTTGTGACTCTGG | HindIII Fragment 26 |
| HOXC_ENH5_Int5R       | CTCTTCCAAGCAGCCTTCTCAGATCTTTCC   | HindIII Fragment 27 |
| HOXC_ENH5_up1R        | CTCTGTGCTGCAAACCTAGTGTTCCTCC     | HindIII Fragment 28 |
| HOXC_ENH5_up2F        | CCTGGGTGGAGGAGTGAGAAGACATACC     | HindIII Fragment 29 |
| HOXC_ENH6_Int6R       | GAGCTCTGCTGCTTGCAAGTGAATGG       | HindIII Fragment 30 |
| HOXC_ENH7_Int7R       | CCATGAGAGGGCACAGGGCAGAATG        | HindIII Fragment 31 |
| HOXC_ENH7_up1R        | GAAGAAAGCAAAGCCCTACCTCACAGG      | HindIII Fragment 32 |
| HOXC_ENH7_up2F        | GGAGTATTGGTAGGTGTGGGAGGCAGG      | HindIII Fragment 33 |
| HOXC_ENH7_up3R        | TGCTTCTCCACCATGCTTATGCTGG        | HindIII Fragment 34 |
| HOXC_ENH7_up4R        | CTGCCCGTTGACCATTTAAGCAACC        | HindIII Fragment 35 |
| HOXC_ENH8_Int8F       | GAGGTTGAGTGAGCCAAGATTGTGC        | HindIII Fragment 36 |
| HOXC_ENH8_up1F        | CTCTTCCATTAATTGGCAGAGGCAGAATGG   | HindIII Fragment 37 |
| HOXC_ENH8_up2F        | GCATCCTGCAACAGAGGGATTTGTTCC      | HindIII Fragment 38 |
| HOXC13_Dw3F           | GCAGATGATTCTTGCCAGTGGGTGG        | HindIII Fragment 39 |
| HOXC13_Dw2F           | CCACTGTGTGAGGCGGGTTTACAGC        | HindIII Fragment 40 |
| HOXC13_Dw1R           | CAGAAGACCCATTTACCATCTTGAGC       | HindIII Fragment 41 |
| HOXC13_geneR          | CAGTGCTTGGCTTATTAATGAATTTCCCTCC  | HindIII Fragment 42 |
| HOXC13b_Int8R         | CACACTAAACCCATTGCACATTGCTCTGG    | HindIII Fragment 43 |
| HOXC12_geneR          | CAAAAGGAGGTGCCTAGCTCCACATGG      | HindIII Fragment 44 |
| HOTAIRa_geneR         | GATGGCAGCACACCTATGAACAGACATTTCG  | HindIII Fragment 45 |
| HOTAIRb_geneF         | CAGGCGATAAATCTCTGGCGAATCTTCC     | HindIII Fragment 46 |
| HOXC11_Int9R          | CTGCCTTCTGCCTGCACATTCTGC         | HindIII Fragment 47 |
| HOXC10prom_Int10aF    | TTCGGAACCTCCTTTTCCGAGCAGC        | HindIII Fragment 48 |
| HOXC10_Int10b_Int11aR | GGACCCGACTCCCACTTCTTACCTTGG      | HindIII Fragment 49 |
| MIR196b_Int11bR       | GTGCTCTGGAGCCACTTCCAATCAGG       | HindIII Fragment 50 |
| HOXC9_geneR           | CTGAGAACAGGGGTGTATCTCCTCAGTCTCC  | HindIII Fragment 51 |

|                    |                                |                     |
|--------------------|--------------------------------|---------------------|
| HOXC8_geneR        | CCTGCTATGGGTAGAGGAGAGGGTCAGAGG | HindIII Fragment 52 |
| HOXC8_up1R         | GACAGTGATGACAATCTTCCTGTGCAGAGG | HindIII Fragment 53 |
| HOXC8_up2R         | TGCGATGCATTTGTGTAGCGTGTGC      | HindIII Fragment 54 |
| HOXC8_up3F         | GCATTGGAGAGGACTGGAGAAGCAAGTG   | HindIII Fragment 55 |
| HOXC6_HOXC5_Int12F | GTTCCACCTGGAAACAGGGCAAACG      | HindIII Fragment 56 |
| HOXC5_up1R         | GGATGGGAAGAGCGAGACAGAGACCCA    | HindIII Fragment 57 |
| HOXC5_up2R         | TGAGGGTGGACTAGAGACTTCGCAAGTGC  | HindIII Fragment 58 |
| HOXC4a_geneR       | GTTAGTTAGAGGTTGGGTTCCCCACCACC  | HindIII Fragment 59 |
| HOXC4b_geneR       | GTTAGTTAGAGGTTGGGTTCCCCACCACC  | HindIII Fragment 60 |

| Oligo Name       | Sequence (5' to 3')           | Application              |
|------------------|-------------------------------|--------------------------|
| GAPDH_F          | TGATGACATCAAGAAGGTGGTGAAGCAGG | 3C Neg. Ctrl             |
| GAPDH_R          | CCTCAACGACCACTTTGTCAAGCTCATTC | 3C Neg. Ctrl             |
| HindIII_Dig_EffF | TTGTTGCTGTCTCTAGGCAGC         | 3C Dig. Effic (+ve ctrl) |
| HindIII_Dig_EffR | CCTGTAAACCCCCTCCCTAACA        | 3C Dig. Effic (+ve ctrl) |

**Table S7.** Primer sequences for HOXC promoter constructs for cloning into pGL3 and subsequent luciferase reporter assays.

| Oligo Name  | Seq 5' to 3'                  |
|-------------|-------------------------------|
| HDE_FOW     | GGCTAATTTTGTATTTTGTAGTAGAGACG |
| HDE_REV     | CTGGAAAAGGGTACTTCAAACC        |
| HOT_Prom_F  | CCTATCTGGTGGGTGCCTGT          |
| HOT_Prom_R  | TCTCTGGCGAATCTTCCTGT          |
| HC10_Prom_F | CAGGGCCTGAAGTAAAGCAG          |
| HC10_Prom_R | AGTCCAGCTGCGAGAGGTAG          |
| HC11_Prom_F | CTCTGGCCAGGAAAAGAGTGG         |
| HC11_Prom_R | CCGCATAGCAGGAGGAGTAGC         |
| ALT1_Prom_F | CTCTCGCCAGATTTCACTGC          |
| ALT1_Prom_R | TTAGCGGATCTTTTCACATGG         |
| ALT2_Prom_F | CTCGTGTTTTGGGTCAGTCC          |
| ALT2_Prom_R | GTCCTGGCTTGCCTCTCC            |
| ALT3_Prom_F | GAGTGCCTGCCTCCTCC             |
| ALT3_Prom_R | TAGAGGGTCCAGGAGGTTC           |

**Table S8.** Taqman Assay IDs for probes used in qRT-PCR assays.

| Gene Name              | Taqman Assay ID |
|------------------------|-----------------|
| ESR1                   | Hs00174860_m1   |
| FOXA1                  | Hs04187555_m1   |
| FOXM1                  | Hs01073586_m1   |
| HER2                   | Hs01001580_m1   |
| HOTAIR Probe1 (HOTAIR) | Hs03296680_s1   |
| HOTAIR Probe2          | Hs03296631_m1   |
| RPLP0                  | Hs99999902_m1   |

**Table S9.** GEO and EBI accession codes for ChIP-Seq, RNA-Seq and ChIA-PET data.

| Experiment                       | GEO        |
|----------------------------------|------------|
| MCF7 Histone                     | GSE23701   |
| Breast Cell Line ER, FoxA1       | E-MTAB-223 |
| MDA-MB-453 AR and FoxA1          | E-MTAB-986 |
| T47D PGR                         | GSE30871   |
| Breast tumour ER                 | GSE32222   |
| RNA-Seq MCF7                     | GSE30567   |
| ChIA-PET ER, RNA Pol II and CTCF | GSE39495   |
| GRO-Seq ER                       | GSE27463   |
| MCF7 cFos                        | GSE26831   |
| MCF7 FoxM1                       | GSE40767   |
| MCF7 E2F1                        | GSE28286   |
